# Supplementary material for: Highly dispersed Pd nanoparticles supported on nitrogen-doped graphene with enhanced hydrogenation activity
Source: Royal Society of Chemistry journal article supplement (doi:10.1039/c5ra12243k), 2015-01-01
Supplement: c5ra12243k1.pdf [file c5ra12243k1.pdf]

# Supporting Information

## Highly dispersed Pd nanoparticles supported on nitrogen-doped graphene with enhanced hydrogenation activity

Ping Liu<sup>a,\*</sup>, Gen Li<sup>a</sup>, Wan-Ting Chang<sup>a</sup>, Meng-Yao Wu<sup>a</sup>, Yong-Xin Li<sup>a,\*</sup>, Jun Wang<sup>b</sup>

<sup>a</sup>*Jiangsu Key Laboratory of Advanced Catalytic Materials and Technology, Institute of Petrochemical Technology, Changzhou University, Changzhou, Jiangsu 213164, China*

<sup>b</sup>*State Key Laboratory of Materials-oriented Chemical Engineering, College of Chemistry and Chemical Engineering, Nanjing University of Technology, Nanjing 210009, China*

\*Corresponding author. Tel: +86-519-86330135.

*E-mail addresses:* pingliu02@163.com (Ping Liu); liyxluck@163.com (Yong-Xin Li).

**Table S1** The specifications of supported Pd catalysts.

| Catalyst       | N source        | The concentration of                                                     |                                   | Pd loading <sup>a</sup><br>(wt.%) |
|----------------|-----------------|--------------------------------------------------------------------------|-----------------------------------|-----------------------------------|
|                |                 | N source in aqueous solution<br>( $\times 10^{-2}$ mol·L <sup>-1</sup> ) | N element inputting amount (mmol) |                                   |
| Pd/rGO         |                 |                                                                          |                                   | 0.58                              |
| Pd/NG-EDA-3.7  | ethylenediamine | 4.6                                                                      | 3.7                               | 0.52                              |
| Pd/NG-AW-1.5   | ammonia         | 3.8                                                                      | 1.5                               | 0.53                              |
| Pd/NG-AW-2.2   | ammonia         | 5.5                                                                      | 2.2                               | 0.54                              |
| Pd/NG-AW-3.0   | ammonia         | 7.5                                                                      | 3.0                               | 0.47                              |
| Pd/NG-AW-3.7   | ammonia         | 9.3                                                                      | 3.7                               | 0.49                              |
| Pd/NG-Urea-2.2 | urea            | 2.8                                                                      | 2.2                               | 0.53                              |
| Pd/NG-Urea-3.7 | urea            | 4.6                                                                      | 3.7                               | 0.45                              |
| Pd/NG-Urea-5.2 | urea            | 6.5                                                                      | 5.2                               | 0.47                              |

<sup>a</sup> The Pd loading was determined using a VISTA.MPX inductively coupled plasma (ICP) spectroscope.

**Table S2** Chemical composition of GO and various N-doped graphenes obtained by the elemental analysis.

| Sample      | C (at%) | O (at%) | N (at%) |
|-------------|---------|---------|---------|
| GO          | 48.2    | 48.5    | 0.3     |
| NG-EDA-3.7  | 70.9    | 18.2    | 7.7     |
| NG-AW-2.2   | 68.4    | 24.5    | 5.6     |
| NG-AW-3.7   | 70.7    | 21.1    | 6.1     |
| NG-Urea-3.7 | 63.3    | 29.4    | 5.7     |

**Table S3** Pd dispersions for various catalysts

| Catalyst       | Pd dispersion (%) |
|----------------|-------------------|
| Pd/rGO         | 12.1              |
| Pd/NG-EDA-3.7  | 64.5              |
| Pd/NG-AW-3.7   | 81.3              |
| Pd/NG-Urea-3.7 | 90.1              |

**Table S4** Chemical composition of various N-doped graphenes obtained by XPS analysis.

| Sample      | C/O/N (at%)   | Pyridinic N (at%) | Amine moieties (at%) | Pyrrolic N (at%) | Graphitic N (at%) |
|-------------|---------------|-------------------|----------------------|------------------|-------------------|
| NG-AW-1.5   | 71.3/24.5/3.2 | 1.0               | 0.6                  | 0.8              | 0.8               |
| NG-AW-3.0   | 74.2/19.3/4.7 | 1.2               | 1.1                  | 1.1              | 1.3               |
| NG-Urea-2.2 | 68.1/26.8/3.7 | 1.1               | 0.7                  | 1.0              | 0.9               |
| NG-Urea-5.2 | 73.7/20.0/5.1 | 1.5               | 1.4                  | 1.4              | 0.8               |

**Table S5** Comparison of catalytic activities of Pd/NG-Urea-3.7 with the commercial Pd/C in the hydrogenation of cyclohexene.

| Catalyst          | Conversion (%) | Selectivity (%) | TOF (mol·(mol <sub>Pd</sub> ·h) <sup>-1</sup> ) |
|-------------------|----------------|-----------------|-------------------------------------------------|
| Pd/C <sup>a</sup> | 26.3           | 100             | 11035                                           |
| Pd/NG-Urea-3.7    | 58.9           | 100             | 27463                                           |

Reaction conditions: 0.01g catalyst, 2 mL cyclohexene, 10 mL ethanol, 30 °C, 1 MPa H<sub>2</sub> pressure, 1 h.

<sup>a</sup> Purchased from Changzhou mesoporous catalytic materials Ltd, Pd loading: 0.5 wt.%.

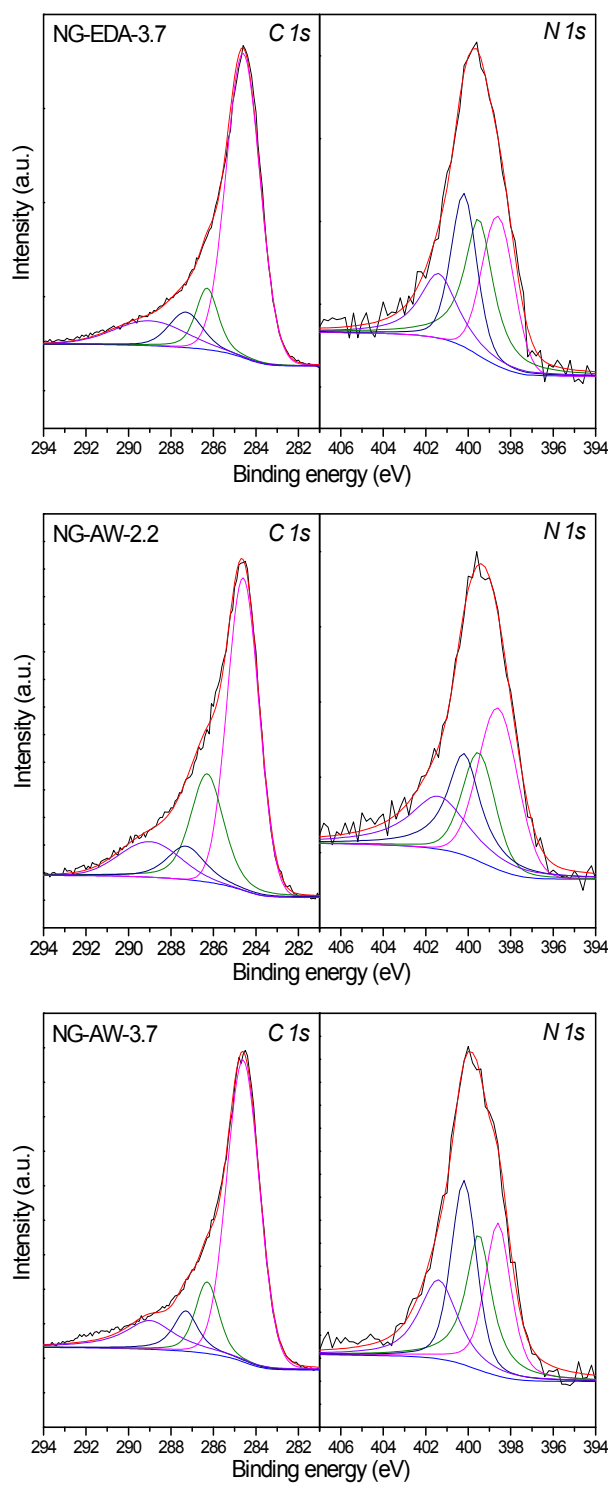

**Fig. S1** XPS spectra of C and N 1s for NG-EDA-3.7, NG-AW-2.2, and NG-AW-3.7.

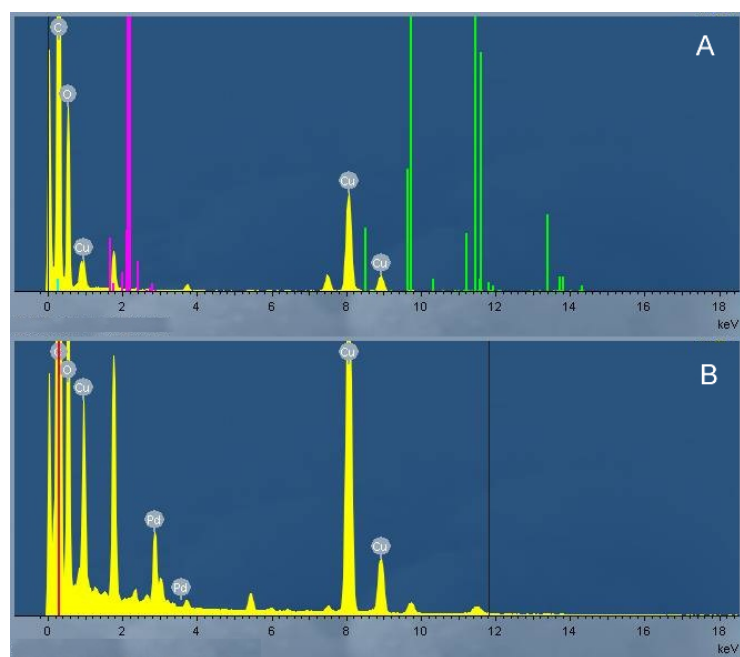

**Fig. S2** EDS spectra of NG-Urea-3.7 (A) and Pd/NG-Urea-3.7 (B).
